# Supplementary material
Source: Elsevier journal article supplement (https://www.sciencedirect.com/science/article/pii/S1405994017300186)
Supplement: mmc1 [file S1405994017300186:mmc1.docx]

***MATERIAL SUPLEMENTARIO***

**ANEXO I. ESTRATEGIA DE BUSQUEDA.**

BASE DE DATOS: Embase

No. Query Results Results Date

#19. 'acute coronary syndrome' OR 'unstable angina 901 12 Apr 2014

pectoris' OR 'heart infarction' AND ('artificial

intelligence' OR 'artificial neural network' OR

'support vector machine' OR 'decision support

system' OR 'fuzzy logic' OR 'expert system' OR

'machine learning' OR (evolutive AND computing)

OR 'genetic algorithms' OR (multiagent AND

system) OR (rational AND agents) OR anfis)

#18. 'artificial intelligence' OR 'artificial neural 118,983 12 Apr 2014

network' OR 'support vector machine' OR 'decision

support system' OR 'fuzzy logic' OR 'expert

system' OR 'machine learning' OR (evolutive AND

computing) OR 'genetic algorithms' OR (multiagent

AND system) OR (rational AND agents) OR anfis

#17. anfis 210 12 Apr 2014

#16. rational AND agents 27,422 12 Apr 2014

#15. multiagent AND system 1,469 12 Apr 2014

#14. 'genetic algorithms' 1,425 12 Apr 2014

#13. evolutive AND computing 36 12 Apr 2014

#12. 'machine learning' 63,569 12 Apr 2014

#11. 'expert system' 5,632 12 Apr 2014

#10. 'fuzzy logic' 2,772 12 Apr 2014

#9. 'decision support system' 13,205 12 Apr 2014

#8. 'support vector machine' 7,208 12 Apr 2014

#7. 'artificial neural network' 20,412 12 Apr 2014

#6. 'artificial intelligence' 15,382 12 Apr 2014

#5. 'acute coronary syndrome' OR 'unstable angina 292,702 12 Apr 2014

pectoris' OR 'heart infarction'

#4. 'heart infarction' 270,506 12 Apr 2014

#3. 'unstable angina pectoris' 17,625 12 Apr 2014

#2. 'acute coronary syndrome' 32,178 12 Apr 2014

#1. acute AND coronary AND 'syndrome'/exp 530 12 Apr 2014

BASE DE DATOS: Pubmed

| #27,"Search (((((((""Myocardial Infarction""[Mesh]) OR myocardial infarction) OR Angina unstable) OR ""Angina, Unstable""[Mesh]) OR acute coronary syndrome) OR ""Acute Coronary Syndrome""[Mesh])) AND ((((((((((((((((((artificial intelligence) OR ""Artificial Intelligence""[Mesh]) OR expert system) OR ""Expert Systems""[Mesh]) OR ""Fuzzy Logic""[Mesh]) OR fuzzy logic) OR Neural Networks) OR ""Neural Networks (Computer)""[Mesh]) OR Support Vector Machines) OR ""Support Vector Machines""[Mesh]) OR Decision Support Systems) OR ""Decision Support Systems, Clinical""[Mesh]) OR machine learning) OR evolutive computing) OR genetic algorithms) OR multi-agent system) OR rational agents) OR ANFIS)",619,15:33:19 |
| --- |
| #26,"Search (((((((((((((((((artificial intelligence) OR ""Artificial Intelligence""[Mesh]) OR expert system) OR ""Expert Systems""[Mesh]) OR ""Fuzzy Logic""[Mesh]) OR fuzzy logic) OR Neural Networks) OR ""Neural Networks (Computer)""[Mesh]) OR Support Vector Machines) OR ""Support Vector Machines""[Mesh]) OR Decision Support Systems) OR ""Decision Support Systems, Clinical""[Mesh]) OR machine learning) OR evolutive computing) OR genetic algorithms) OR multi-agent system) OR rational agents) OR ANFIS",122250,15:32:02 |
| #25,"Search ANFIS",157,15:30:32 |
| #24,"Search rational agents",9371,15:30:16 |
| #23,"Search multi-agent system",182,15:30:03 |
| #22,"Search genetic algorithms",17237,15:29:46 |
| #21,"Search evolutive computing",8,15:29:17 |
| #20,"Search machine learning",56263,15:28:01 |
| #19,"Search ""Decision Support Systems, Clinical""[Mesh]",4635,15:21:38 |
| #18,"Search Decision Support Systems",15256,15:21:20 |
| #17,"Search ""Support Vector Machines""[Mesh]",1202,15:21:02 |
| #16,"Search Support Vector Machines",3321,15:20:48 |
| #15,"Search ""Neural Networks (Computer)""[Mesh]",16097,15:20:14 |
| #14,"Search Neural Networks",29778,15:19:40 |
| #13,"Search fuzzy logic",3411,15:18:49 |
| #12,"Search ""Fuzzy Logic""[Mesh]",2965,15:18:40 |
| #11,"Search ""Expert Systems""[Mesh]",3015,15:18:17 |
| #10,"Search expert system",18692,15:18:06 |
| #9,"Search ""Artificial Intelligence""[Mesh]",51552,15:17:46 |
| #8,"Search artificial intelligence",52999,15:17:35 |
| #7,"Search (((((""Myocardial Infarction""[Mesh]) OR myocardial infarction) OR Angina unstable) OR ""Angina, Unstable""[Mesh]) OR acute coronary syndrome) OR ""Acute Coronary Syndrome""[Mesh]",210415,15:17:08 |
| #6,"Search ""Myocardial Infarction""[Mesh]",143804,15:16:46 |
| #5,"Search myocardial infarction",194810,15:16:29 |
| #4,"Search Angina unstable",16216,15:14:51 |
| #3,"Search ""Angina, Unstable""[Mesh]",9841,15:14:41 |
| #2,"Search acute coronary syndrome",17960,15:13:39 |
| #1,"Search ""Acute Coronary Syndrome""[Mesh]",7021,15:13:04 |

BASE DE DATOS: SCOPUS

((TITLE-ABS-KEY(acute coronary syndrome) OR TITLE-ABS-KEY(angina,unstable) OR TITLE-ABS-KEY(myocardial infarction))) AND ((TITLE-ABS-KEY(artificial intelligence) OR TITLE-ABS-KEY(expert system) OR TITLE-ABS-KEY(fuzzy logic) OR TITLE-ABS-KEY(neural networks) OR TITLE-ABS-KEY(support vector machine) OR TITLE-ABS-KEY(decision support systems) OR TITLE-ABS-KEY(machine learning) OR TITLE-ABS-KEY(evolutive computing) OR TITLE-ABS-KEY(genetic algorithms) OR TITLE-ABS-KEY(multi-agent system) OR TITLE-ABS-KEY(rational agents) OR TITLE-ABS-KEY(anfis)))

BASE DE DATOS: Web of science

| #3 | #1 AND #2  *DocType=All document types; Language=All languages;* |
| --- | --- |
| #2 | **TOPIC:** *(artificial intelligence)* *OR* **TOPIC:** *(expert system)* *OR* **TOPIC:** *(Fuzzy Logic)* *OR* **TOPIC:** *(Neural Networks)* *OR* **TOPIC:** *(Support Vector Machines)* *OR* **TOPIC:** *(Decision Support Systems)* *OR* **TOPIC:** *(machine learning)* *OR* **TOPIC:** *(evolutive computing)* *OR* **TOPIC:** *(genetic algorithms)* *OR* **TOPIC:** *(multi-agent system)* *OR* **TOPIC:** *(rational agents)* *OR* **TOPIC:** *(ANFIS)*  *DocType=All document types; Language=All languages;* |
| #1 | **TOPIC:** *(exp acute coronary syndrome)* *OR* **TOPIC:** *(acute coronary syndrome)* *OR* **TOPIC:** *(Angina unstable)* *OR* **TOPIC:** *(myocardial infarction)*  *DocType=All document types; Language=All languages;* |
